# Supplementary material
Source: Springer Nature journal article supplement (http://www.springermedizin.de/resource/supplementary/13063_2013_1898_MOESM1_ESM.pdf/9622050)
Supplement: MOESM1 [file 9622050]

## Screening period

Exclusion/inclusion criteria  
Informed consent  
Procedure related information  
Urine pregnancy test  
Markwalder score  
Blood glucose, intraocular pressure  
Neurological worsening events  
Serious adverse Events

**Operation - day 0**

## Randomization

Performed at any time after admission  
study drug application has to start within 48 hours postoperatively

## Treatment period

Day 1 to 6 of study drug medication  
Markwalder score daily  
Blood glucose and intraocular pressure on Day 3  
Neurological worsening events  
Adverse and serious adverse events

## Follow-up period

Week 4 and 12 post surgery  
Week 24 only in case of reoperation  
Post-discharge information  
Markwalder score  
Neurological worsening events  
Adverse and serious adverse events
